# Supplementary material
Source: publisher figshare collection journal article supplement (https://acs.figshare.com/ndownloader/files/4548235)
Supplement: Supplementary file 1 [file 4548235]

 

 
 
 
 
 
 
 
 
data_sw0504 
 
_audit_creation_method            SHELXL-97 
_chemical_name_systematic 
; 
 ? 
; 
_chemical_name_common             ? 
_chemical_melting_point           ? 
_chemical_formula_moiety
 'C14 H24 N2 O2' 
_chemical_formula_sum 
 'C14 H24 N2 O2' 
_chemical_formula_weight          252.35
_chemical_absolute_configuration
;
 1383 Friedel pairs averaged for the refinement. 
;

loop_ 
 _atom_type_symbol 
 _atom_type_description 
 _atom_type_scat_dispersion_real 
 _atom_type_scat_dispersion_imag 
 _atom_type_scat_source 
 'C'  'C'   0.0033   0.0016 
 'International Tables Vol C Tables 4.2.6.8 and 6.1.1.4' 
 'H'  'H'   0.0000   0.0000 
 'International Tables Vol C Tables 4.2.6.8 and 6.1.1.4' 
 'N'  'N'   0.0061   0.0033 
 'International Tables Vol C Tables 4.2.6.8 and 6.1.1.4' 
 'O'  'O'   0.0106   0.0060 
 'International Tables Vol C Tables 4.2.6.8 and 6.1.1.4' 
 
_symmetry_cell_setting            Orthorhombic 
_symmetry_space_group_name_H-M    P2(1)2(1)2(1)
 
loop_ 
 _symmetry_equiv_pos_as_xyz 
 'x, y, z' 
 '-x+1/2, -y, z+1/2' 
 'x+1/2, -y+1/2, -z' 
 '-x, y+1/2, -z+1/2' 
 
_cell_length_a                    10.2116(2) 
_cell_length_b                    10.8607(3) 
_cell_length_c                    13.1256(4) 
_cell_angle_alpha                 90.00 
_cell_angle_beta                  90.00 
_cell_angle_gamma                 90.00 
_cell_volume                      1455.70(7) 
_cell_formula_units_Z             4 
_cell_measurement_temperature     180(2) 
_cell_measurement_reflns_used     8554 
_cell_measurement_theta_min       1.00 
_cell_measurement_theta_max       27.48 
 
_exptl_crystal_description        block 
_exptl_crystal_colour             colourless 
_exptl_crystal_size_max           0.46 
_exptl_crystal_size_mid           0.10 
_exptl_crystal_size_min           0.07 
_exptl_crystal_density_meas       ? 
_exptl_crystal_density_diffrn     1.151 
_exptl_crystal_density_method     'not measured' 
_exptl_crystal_F_000              552 
_exptl_absorpt_coefficient_mu     0.077 
_exptl_absorpt_correction_type 'multi-scan' 
_exptl_absorpt_correction_T_min  0.808
_exptl_absorpt_correction_T_max  0.996
_exptl_absorpt_process_details
;
multi-scan from symmetry-related measurements 
 Sortav (Blessing 1995)
;
 
_exptl_special_details 
; 
 
; 
 
_diffrn_ambient_temperature       180(2) 
_diffrn_radiation_wavelength      0.71073 
_diffrn_radiation_type            MoK\a 
_diffrn_radiation_source          'fine-focus sealed tube'
_diffrn_measurement_device_type   'Nonius Kappa CCD'
_diffrn_measurement_method        'Thin slice \w and \f scans'
_diffrn_reflns_number             12104 
_diffrn_reflns_av_R_equivalents   0.0461 
_diffrn_reflns_av_sigmaI/netI     0.0304 
_diffrn_reflns_limit_h_min        -9 
_diffrn_reflns_limit_h_max        13 
_diffrn_reflns_limit_k_min        -14 
_diffrn_reflns_limit_k_max        14 
_diffrn_reflns_limit_l_min        -16 
_diffrn_reflns_limit_l_max        17 
_diffrn_reflns_theta_min          3.63 
_diffrn_reflns_theta_max          27.48 
_reflns_number_total              1908 
_reflns_number_gt                 1657 
_reflns_threshold_expression      >2sigma(I) 
 
_computing_data_collection        'Collect (Nonius B.V. 1998)'
_computing_cell_refinement        'HKL Scalepack (Otwinowski & Minor 1997)' 
_computing_data_reduction
;
 HKL Denzo and Scalepack (Otwinowski & Minor 1997)
;
_computing_structure_solution     'SIR-92 (Altomare et al. 1994)'
_computing_structure_refinement   'SHELXL-97 (Sheldrick 1997)' 
_computing_publication_material   'SHELXL-97 (Sheldrick 1997)' 
 
_refine_special_details 
; 
 Refinement of F^2^ against ALL reflections.  The weighted R-factor wR and 
 goodness of fit S are based on F^2^, conventional R-factors R are based 
 on F, with F set to zero for negative F^2^. The threshold expression of 
 F^2^ > 2sigma(F^2^) is used only for calculating R-factors(gt) etc. and is 
 not relevant to the choice of reflections for refinement.  R-factors based 
 on F^2^ are statistically about twice as large as those based on F, and R- 
 factors based on ALL data will be even larger. 
; 
 
_refine_ls_structure_factor_coef  Fsqd  
_refine_ls_matrix_type            full 
_refine_ls_weighting_scheme       calc  
_refine_ls_weighting_details 
 'calc w=1/[\s^2^(Fo^2^)+(0.0287P)^2^+0.3553P] where P=(Fo^2^+2Fc^2^)/3' 
_atom_sites_solution_primary      direct 
_atom_sites_solution_secondary    difmap 
_atom_sites_solution_hydrogens    geom 
_refine_ls_hydrogen_treatment     constr
_refine_ls_extinction_method      none 
_refine_ls_extinction_coef        ? 
_refine_ls_abs_structure_details 
 'Flack H D (1983), Acta Cryst. A39, 876-881' 
_refine_ls_abs_structure_Flack    4.8(17) 
_refine_ls_number_reflns          1908 
_refine_ls_number_parameters      164 
_refine_ls_number_restraints      0 
_refine_ls_R_factor_all           0.0523 
_refine_ls_R_factor_gt            0.0402 
_refine_ls_wR_factor_ref          0.0879 
_refine_ls_wR_factor_gt           0.0820 
_refine_ls_goodness_of_fit_ref    1.102 
_refine_ls_restrained_S_all       1.102 
_refine_ls_shift/su_max           0.000 
_refine_ls_shift/su_mean          0.000 
 
loop_ 
 _atom_site_label 
 _atom_site_type_symbol 
 _atom_site_fract_x 
 _atom_site_fract_y 
 _atom_site_fract_z 
 _atom_site_U_iso_or_equiv 
 _atom_site_adp_type 
 _atom_site_occupancy 
 _atom_site_symmetry_multiplicity 
 _atom_site_calc_flag 
 _atom_site_refinement_flags 
 _atom_site_disorder_assembly 
 _atom_site_disorder_group 
O1 O 0.49946(13) 0.26584(13) 0.56183(11) 0.0339(3) Uani 1 1 d . . . 
O2 O 0.90861(13) 0.35119(15) 0.70663(11) 0.0399(4) Uani 1 1 d . . . 
N1 N 0.60035(16) 0.14348(16) 0.44839(12) 0.0309(4) Uani 1 1 d . . . 
H1N H 0.5276 0.1421 0.4124 0.037 Uiso 1 1 calc R . . 
N2 N 0.69839(15) 0.30456(16) 0.67665(13) 0.0304(4) Uani 1 1 d . . . 
H2N H 0.6166 0.3165 0.6953 0.036 Uiso 1 1 calc R . . 
C1 C 0.59854(18) 0.20985(17) 0.53313(14) 0.0252(4) Uani 1 1 d . . . 
C2 C 0.72381(17) 0.21489(17) 0.59703(14) 0.0243(4) Uani 1 1 d . . . 
H2 H 0.7974 0.2451 0.5534 0.029 Uiso 1 1 calc R . . 
C3 C 0.7612(2) 0.08895(19) 0.64221(15) 0.0310(4) Uani 1 1 d . . . 
H3A H 0.8198 0.1026 0.7013 0.037 Uiso 1 1 calc R . . 
H3B H 0.6808 0.0485 0.6678 0.037 Uiso 1 1 calc R . . 
C4 C 0.8293(2) 0.0016(2) 0.56773(17) 0.0362(5) Uani 1 1 d . . . 
H4A H 0.9111 0.0412 0.5440 0.043 Uiso 1 1 calc R . . 
H4B H 0.8542 -0.0741 0.6050 0.043 Uiso 1 1 calc R . . 
C5 C 0.7491(2) -0.03526(19) 0.47480(18) 0.0390(5) Uani 1 1 d . . . 
H5A H 0.8005 -0.0943 0.4335 0.047 Uiso 1 1 calc R . . 
H5B H 0.6687 -0.0779 0.4979 0.047 Uiso 1 1 calc R . . 
C6 C 0.7107(2) 0.0723(2) 0.40838(16) 0.0350(5) Uani 1 1 d . . . 
H6A H 0.7871 0.1276 0.4008 0.042 Uiso 1 1 calc R . . 
H6B H 0.6876 0.0412 0.3398 0.042 Uiso 1 1 calc R . . 
C7 C 0.79168(19) 0.3702(2) 0.72347(14) 0.0289(4) Uani 1 1 d . . . 
C8 C 0.7477(2) 0.46503(18) 0.80266(14) 0.0312(5) Uani 1 1 d . . . 
C9 C 0.6068(2) 0.5108(2) 0.78881(16) 0.0379(5) Uani 1 1 d . . . 
H9A H 0.5474 0.4388 0.7870 0.046 Uiso 1 1 calc R . . 
H9B H 0.5824 0.5613 0.8486 0.046 Uiso 1 1 calc R . . 
C10 C 0.5857(2) 0.5870(2) 0.69228(18) 0.0439(6) Uani 1 1 d . . . 
H10A H 0.5981 0.5340 0.6317 0.053 Uiso 1 1 calc R . . 
H10B H 0.4947 0.6186 0.6911 0.053 Uiso 1 1 calc R . . 
C11 C 0.6807(3) 0.6945(2) 0.6876(2) 0.0510(7) Uani 1 1 d . . . 
H11A H 0.6593 0.7540 0.7423 0.061 Uiso 1 1 calc R . . 
H11B H 0.6710 0.7372 0.6214 0.061 Uiso 1 1 calc R . . 
C12 C 0.8217(2) 0.6515(2) 0.7000(2) 0.0487(6) Uani 1 1 d . . . 
H12A H 0.8467 0.6005 0.6406 0.058 Uiso 1 1 calc R . . 
H12B H 0.8805 0.7240 0.7019 0.058 Uiso 1 1 calc R . . 
C13 C 0.8396(2) 0.5768(2) 0.79708(17) 0.0404(5) Uani 1 1 d . . . 
H13A H 0.8232 0.6306 0.8566 0.049 Uiso 1 1 calc R . . 
H13B H 0.9314 0.5479 0.8010 0.049 Uiso 1 1 calc R . . 
C14 C 0.7627(3) 0.4022(2) 0.90684(16) 0.0510(7) Uani 1 1 d . . . 
H14A H 0.8523 0.3713 0.9142 0.076 Uiso 1 1 calc R . . 
H14B H 0.7009 0.3335 0.9118 0.076 Uiso 1 1 calc R . . 
H14C H 0.7444 0.4619 0.9610 0.076 Uiso 1 1 calc R . . 
 
loop_ 
 _atom_site_aniso_label 
 _atom_site_aniso_U_11 
 _atom_site_aniso_U_22 
 _atom_site_aniso_U_33 
 _atom_site_aniso_U_23 
 _atom_site_aniso_U_13 
 _atom_site_aniso_U_12 
O1 0.0239(6) 0.0391(9) 0.0388(8) -0.0020(7) -0.0023(6) 0.0062(6) 
O2 0.0245(7) 0.0579(10) 0.0373(8) -0.0136(8) 0.0029(6) -0.0014(7) 
N1 0.0240(8) 0.0379(9) 0.0307(8) -0.0031(8) -0.0050(7) 0.0003(8) 
N2 0.0207(8) 0.0385(10) 0.0319(9) -0.0082(8) 0.0039(7) 0.0021(7) 
C1 0.0239(9) 0.0244(9) 0.0274(9) 0.0039(8) 0.0000(8) -0.0010(8) 
C2 0.0213(8) 0.0288(10) 0.0227(9) -0.0011(8) 0.0008(7) -0.0007(8) 
C3 0.0273(10) 0.0344(11) 0.0314(10) 0.0057(9) 0.0002(8) 0.0021(9) 
C4 0.0318(11) 0.0286(11) 0.0481(13) 0.0042(11) 0.0007(10) 0.0050(9) 
C5 0.0363(12) 0.0275(11) 0.0533(14) -0.0089(10) 0.0044(10) 0.0001(9) 
C6 0.0323(10) 0.0387(12) 0.0339(11) -0.0106(10) 0.0019(9) -0.0021(10) 
C7 0.0293(10) 0.0351(11) 0.0221(9) 0.0004(8) 0.0011(7) -0.0008(9) 
C8 0.0385(11) 0.0344(11) 0.0206(9) -0.0038(8) 0.0017(9) -0.0010(9) 
C9 0.0369(11) 0.0369(12) 0.0400(12) -0.0108(10) 0.0088(10) 0.0017(10) 
C10 0.0389(12) 0.0446(13) 0.0482(13) -0.0105(12) -0.0083(11) 0.0103(11) 
C11 0.0688(17) 0.0394(13) 0.0449(14) 0.0053(12) -0.0092(13) 0.0009(12) 
C12 0.0539(14) 0.0438(13) 0.0482(14) 0.0044(12) -0.0029(12) -0.0164(12) 
C13 0.0461(13) 0.0410(13) 0.0343(11) -0.0086(11) -0.0094(10) -0.0059(11) 
C14 0.0758(18) 0.0501(15) 0.0271(11) 0.0005(11) 0.0035(12) 0.0063(14) 
 
_geom_special_details 
; 
 All esds (except the esd in the dihedral angle between two l.s. planes) 
 are estimated using the full covariance matrix.  The cell esds are taken 
 into account individually in the estimation of esds in distances, angles 
 and torsion angles; correlations between esds in cell parameters are only 
 used when they are defined by crystal symmetry.  An approximate (isotropic) 
 treatment of cell esds is used for estimating esds involving l.s. planes. 
; 
 
loop_ 
 _geom_bond_atom_site_label_1 
 _geom_bond_atom_site_label_2 
 _geom_bond_distance 
 _geom_bond_site_symmetry_2 
 _geom_bond_publ_flag 
O1 C1 1.239(2) . ? 
O2 C7 1.232(2) . ? 
N1 C1 1.326(2) . ? 
N1 C6 1.464(3) . ? 
N1 H1N 0.8800 . ? 
N2 C7 1.339(3) . ? 
N2 C2 1.452(2) . ? 
N2 H2N 0.8800 . ? 
C1 C2 1.531(3) . ? 
C2 C3 1.539(3) . ? 
C2 H2 1.0000 . ? 
C3 C4 1.529(3) . ? 
C3 H3A 0.9900 . ? 
C3 H3B 0.9900 . ? 
C4 C5 1.523(3) . ? 
C4 H4A 0.9900 . ? 
C4 H4B 0.9900 . ? 
C5 C6 1.510(3) . ? 
C5 H5A 0.9900 . ? 
C5 H5B 0.9900 . ? 
C6 H6A 0.9900 . ? 
C6 H6B 0.9900 . ? 
C7 C8 1.531(3) . ? 
C8 C9 1.534(3) . ? 
C8 C13 1.535(3) . ? 
C8 C14 1.536(3) . ? 
C9 C10 1.529(3) . ? 
C9 H9A 0.9900 . ? 
C9 H9B 0.9900 . ? 
C10 C11 1.519(3) . ? 
C10 H10A 0.9900 . ? 
C10 H10B 0.9900 . ? 
C11 C12 1.523(4) . ? 
C11 H11A 0.9900 . ? 
C11 H11B 0.9900 . ? 
C12 C13 1.522(3) . ? 
C12 H12A 0.9900 . ? 
C12 H12B 0.9900 . ? 
C13 H13A 0.9900 . ? 
C13 H13B 0.9900 . ? 
C14 H14A 0.9800 . ? 
C14 H14B 0.9800 . ? 
C14 H14C 0.9800 . ? 
 
loop_ 
 _geom_angle_atom_site_label_1 
 _geom_angle_atom_site_label_2 
 _geom_angle_atom_site_label_3 
 _geom_angle 
 _geom_angle_site_symmetry_1 
 _geom_angle_site_symmetry_3 
 _geom_angle_publ_flag 
C1 N1 C6 126.78(17) . . ? 
C1 N1 H1N 116.6 . . ? 
C6 N1 H1N 116.6 . . ? 
C7 N2 C2 124.07(16) . . ? 
C7 N2 H2N 118.0 . . ? 
C2 N2 H2N 118.0 . . ? 
O1 C1 N1 122.22(17) . . ? 
O1 C1 C2 119.89(17) . . ? 
N1 C1 C2 117.88(16) . . ? 
N2 C2 C1 105.60(14) . . ? 
N2 C2 C3 111.29(15) . . ? 
C1 C2 C3 112.76(15) . . ? 
N2 C2 H2 109.0 . . ? 
C1 C2 H2 109.0 . . ? 
C3 C2 H2 109.0 . . ? 
C4 C3 C2 114.70(16) . . ? 
C4 C3 H3A 108.6 . . ? 
C2 C3 H3A 108.6 . . ? 
C4 C3 H3B 108.6 . . ? 
C2 C3 H3B 108.6 . . ? 
H3A C3 H3B 107.6 . . ? 
C5 C4 C3 115.52(18) . . ? 
C5 C4 H4A 108.4 . . ? 
C3 C4 H4A 108.4 . . ? 
C5 C4 H4B 108.4 . . ? 
C3 C4 H4B 108.4 . . ? 
H4A C4 H4B 107.5 . . ? 
C6 C5 C4 113.51(17) . . ? 
C6 C5 H5A 108.9 . . ? 
C4 C5 H5A 108.9 . . ? 
C6 C5 H5B 108.9 . . ? 
C4 C5 H5B 108.9 . . ? 
H5A C5 H5B 107.7 . . ? 
N1 C6 C5 113.67(18) . . ? 
N1 C6 H6A 108.8 . . ? 
C5 C6 H6A 108.8 . . ? 
N1 C6 H6B 108.8 . . ? 
C5 C6 H6B 108.8 . . ? 
H6A C6 H6B 107.7 . . ? 
O2 C7 N2 121.19(19) . . ? 
O2 C7 C8 121.27(18) . . ? 
N2 C7 C8 117.46(17) . . ? 
C7 C8 C9 114.39(17) . . ? 
C7 C8 C13 108.67(17) . . ? 
C9 C8 C13 108.15(17) . . ? 
C7 C8 C14 106.06(17) . . ? 
C9 C8 C14 110.05(18) . . ? 
C13 C8 C14 109.43(18) . . ? 
C10 C9 C8 113.96(18) . . ? 
C10 C9 H9A 108.8 . . ? 
C8 C9 H9A 108.8 . . ? 
C10 C9 H9B 108.8 . . ? 
C8 C9 H9B 108.8 . . ? 
H9A C9 H9B 107.7 . . ? 
C11 C10 C9 111.07(19) . . ? 
C11 C10 H10A 109.4 . . ? 
C9 C10 H10A 109.4 . . ? 
C11 C10 H10B 109.4 . . ? 
C9 C10 H10B 109.4 . . ? 
H10A C10 H10B 108.0 . . ? 
C10 C11 C12 111.3(2) . . ? 
C10 C11 H11A 109.4 . . ? 
C12 C11 H11A 109.4 . . ? 
C10 C11 H11B 109.4 . . ? 
C12 C11 H11B 109.4 . . ? 
H11A C11 H11B 108.0 . . ? 
C13 C12 C11 111.5(2) . . ? 
C13 C12 H12A 109.3 . . ? 
C11 C12 H12A 109.3 . . ? 
C13 C12 H12B 109.3 . . ? 
C11 C12 H12B 109.3 . . ? 
H12A C12 H12B 108.0 . . ? 
C12 C13 C8 112.85(18) . . ? 
C12 C13 H13A 109.0 . . ? 
C8 C13 H13A 109.0 . . ? 
C12 C13 H13B 109.0 . . ? 
C8 C13 H13B 109.0 . . ? 
H13A C13 H13B 107.8 . . ? 
C8 C14 H14A 109.5 . . ? 
C8 C14 H14B 109.5 . . ? 
H14A C14 H14B 109.5 . . ? 
C8 C14 H14C 109.5 . . ? 
H14A C14 H14C 109.5 . . ? 
H14B C14 H14C 109.5 . . ? 
 
loop_ 
 _geom_torsion_atom_site_label_1 
 _geom_torsion_atom_site_label_2 
 _geom_torsion_atom_site_label_3 
 _geom_torsion_atom_site_label_4 
 _geom_torsion 
 _geom_torsion_site_symmetry_1 
 _geom_torsion_site_symmetry_2 
 _geom_torsion_site_symmetry_3 
 _geom_torsion_site_symmetry_4 
 _geom_torsion_publ_flag 
C6 N1 C1 O1 -178.91(19) . . . . ? 
C6 N1 C1 C2 0.4(3) . . . . ? 
C7 N2 C2 C1 -153.55(19) . . . . ? 
C7 N2 C2 C3 83.8(2) . . . . ? 
O1 C1 C2 N2 -7.4(2) . . . . ? 
N1 C1 C2 N2 173.24(16) . . . . ? 
O1 C1 C2 C3 114.30(19) . . . . ? 
N1 C1 C2 C3 -65.0(2) . . . . ? 
N2 C2 C3 C4 -162.15(16) . . . . ? 
C1 C2 C3 C4 79.4(2) . . . . ? 
C2 C3 C4 C5 -61.7(2) . . . . ? 
C3 C4 C5 C6 61.0(2) . . . . ? 
C1 N1 C6 C5 65.8(3) . . . . ? 
C4 C5 C6 N1 -78.2(2) . . . . ? 
C2 N2 C7 O2 -5.7(3) . . . . ? 
C2 N2 C7 C8 177.41(16) . . . . ? 
O2 C7 C8 C9 159.4(2) . . . . ? 
N2 C7 C8 C9 -23.7(3) . . . . ? 
O2 C7 C8 C13 38.4(3) . . . . ? 
N2 C7 C8 C13 -144.66(19) . . . . ? 
O2 C7 C8 C14 -79.1(2) . . . . ? 
N2 C7 C8 C14 97.8(2) . . . . ? 
C7 C8 C9 C10 -67.0(2) . . . . ? 
C13 C8 C9 C10 54.2(2) . . . . ? 
C14 C8 C9 C10 173.69(18) . . . . ? 
C8 C9 C10 C11 -54.8(3) . . . . ? 
C9 C10 C11 C12 53.4(3) . . . . ? 
C10 C11 C12 C13 -54.8(3) . . . . ? 
C11 C12 C13 C8 56.6(3) . . . . ? 
C7 C8 C13 C12 70.0(2) . . . . ? 
C9 C8 C13 C12 -54.8(2) . . . . ? 
C14 C8 C13 C12 -174.6(2) . . . . ? 
 
_diffrn_measured_fraction_theta_max    0.995 
_diffrn_reflns_theta_full              27.48 
_diffrn_measured_fraction_theta_full   0.995 
_refine_diff_density_max    0.168 
_refine_diff_density_min   -0.150 
_refine_diff_density_rms    0.033 
